# Supplementary material for: Broad impact of extracellular DNA on biofilm formation by clinically isolated Methicillin-resistant and -sensitive strains of Staphylococcus aureus
Source: Sci Rep. 2018 Feb 2;8:2254. doi: 10.1038/s41598-018-20485-z (PMC5797107; doi:10.1038/s41598-018-20485-z)

## Supplementary Information

### **Broad impact of extracellular DNA on biofilm formation by clinically isolated Methicillin-resistant and -sensitive strains of *Staphylococcus aureus***

Shinya Sugimoto<sup>1,2†\*</sup>, Fumiya Sato<sup>1,3†</sup>, Reina Miyakawa<sup>1</sup>, Akio Chiba<sup>1,2</sup>, Shoichi Onodera<sup>3</sup>, Seiji Hori<sup>3</sup>, and Yoshimitsu Mizunoe<sup>1,2</sup>

<sup>1</sup> Department of Bacteriology, The Jikei University School of Medicine 3-25-8, Nishi-Shimbashi, Minato-ku, Tokyo, Japan.

<sup>2</sup> Jikei Center for Biofilm Research and Technology, The Jikei University School of Medicine 3-25-8, Nishi-Shimbashi, Minato-ku, Tokyo, Japan.

<sup>3</sup> Department of Infectious Disease and Control, The Jikei University School of Medicine 3-25-8, Nishi-Shimbashi, Minato-ku, Tokyo, Japan.

† Both authors contributed equally to the study.

\* For correspondence. E-mail: ssugimoto@jikei.ac.jp; Tel: (+81) 3 3433 1111; Fax: (+81) 3 3433 1111.

Running title: Importance of eDNA in diverse *Staphylococcus aureus* biofilms

## SUPPLEMENTARY METHODS

### Construction of strain

Mutant strain of *S. aureus* RN4220 were constructed using the *E. coli*-*S. aureus* shuttle vector pKOR1<sup>1</sup> according to the procedure modified by Chiba *et al.*<sup>2</sup>. In brief, approximately 500-bp upstream and downstream sequences of the *icaA* gene was amplified by PCR from the RN4220 genomic DNA using the following primer sets: *attB1-icaA*-F (5'-GGGGACAAGTTTGTACAAAAAAGCAGGCTGAATTGATATAAAGCATCAAT TGAATAG-3') and *icaA*-R (5'-CTGTTTCTCTTACAATATTTAGCGATGATTTTTCTTTACCTACCTTTTCGTTAG TTAGGTT-3'); *icaA*-F (5'-AACCTAACTAACGAAAGGTAGGTAAAGAAAAATCATCGCTAAATATTGTA AGAGAAACAG-3') and *attB2-icaA*-R (5'-GGGGACCACTTTGTACAAGAAAGCTGGGTCAGAAAATTCGCTTTTCTTAC AC-3'). These fragments were connected by splicing by overlap extension PCR (SOE-PCR)<sup>3</sup>. The created PCR product was cloned into pKOR1 using the Gateway BP Clonase II enzyme mix (Life Technologies, Palo Alto, CA, USA); the resulting plasmids are referred to as pKOR1- $\Delta$ *icaA*. Using this plasmid, the *icaA* gene was deleted solely or sequentially from the RN4220 genomic DNA according to the procedure reported previously<sup>1,2</sup>.

For deletion of *icaA* from MR10, following primer sets were used: *icaA*\_F (5'-GGGGACAAGTTTGTACAAAAAAGCAGGCTGAATTGATATAAAGCATCAAT TGAATAG-3') and SOE-R (5'-TCTCTTACAATATTTAGCGATGATTATTTATGTCAGGCTTCTTGTTCAAT-3') and *icaA*\_R (5'-GGGGACCACTTTGTACAAGAAAGCTGGGTC AGAAAATTCGCTTTTCTTACAC-3') and SOE-F (5'-ATTGAACAAGAAGCCTGACATAAATAATCA TCGCTAAATATTGTAAGAGA-3'). Other procedures were similar to the construction of RN4220  $\Delta$ *icaA*.

### Characterisation of the genetic background

The *agr* types were determined by a multiplex PCR assay as described previously<sup>4</sup>. The multi-locus sequence typing (MLST) types were determined to detect the following seven housekeeping genes: carbamate kinase (*arcC*), shikimate dehydrogenase (*aroE*), glycerol kinase (*glpF*), guanylate kinase (*gmk*), phosphate acetyltransferase (*pta*), triosephosphate isomerase (*tpi*), and acetyl coenzyme A acetyltransferase (*yqiL*)<sup>5</sup>. The

sequences of the PCR products were compared with the existing sequences available from the website (<http://saureus.mlst.net/>). The MLST types were determined at the allelic query site ([http://saureus.mlst.net/sql/allelicprofile\\_choice.asp](http://saureus.mlst.net/sql/allelicprofile_choice.asp)).

### **Hemolytic activity assay**

An overnight culture (5  $\mu$ L) of the indicated strains was spotted onto a sheep blood agar plate (Eiken Kagaku, Tokyo, Japan). The plate was incubated at 37°C overnight and stored at 4°C for additional 24 h. Pictures were taken using digital camera and hemolytic activities were judged by formation of halo around colonies.

### **Quantification of eDNA in the extracellular matrix (ECM)**

Concentration of eDNA in the isolated ECM was measured using Qubit dsDNA BR Kit (Thermo Fisher Scientific Inc., Waltham, MA, USA) according to the manufacture's instruction.

### **Lectin blotting**

To detect PIA in isolated ECM, lectin blotting was conducted using HRP-WGA (Vector Laboratories, Burlingame, CA, USA). The isolated ECM was electrophoretically separated by SDS-PAGE and transferred to a PVDF membrane. The membrane was treated with a blocking solution containing 3% BSA in TBS-T for 1 h at 25°C. After gentle washing with TBS-T, the membrane was probed with HRP-WGA (5 ng/ml in TBS-T) for 1 h at 25°C. After washing three times with TBS-T, PIA-related signals were detected using ECL Prime on LAS-4000.

## **SUPPLEMENTARY FIGURE LEGENDS**

**Figure S1. Biomass of biofilms formed by control *S. aureus* strains under different culture conditions.** Biofilms of *S. aureus* RN4220 wild-type and its isogenic  $\Delta$ *icaA* strains were formed in the indicated media at 37°C for 24 h. BHIG: brain heart infusion (BHI) supplemented with glucose, BHIN: BHI supplemented with NaCl, TSBG: tryptic soy broth (TSB) supplemented with glucose, and TSBN: TSB supplemented with NaCl. Y-axis represents biofilm biomass determined by measuring absorbance of CV-stained

biofilms at 595 nm. Data are represented as mean  $\pm$  standard deviation from at least three independent experiments.

**Figure S2. Comparison of biofilm-forming capacity, antibiotic resistance and staphylococcal species.** Comparison of biofilm-producing capacity between MRSA and MSSA grown in media supplemented with glucose or NaCl for biofilm formation in each strain. The line in each box plot represents the median biofilm-forming capacity (biofilm biomass determined in Fig. 1) of the indicated groups. NS, not significant.

**Figure S3. Analysis for correlation between biofilm-forming capacity and the *agr* types.** Statistical analyses were performed to compare biofilm-forming capacity among the *agr* types in *S. aureus*. The line in each box plot represents the median biofilm-forming capacity (biofilm biomass determined in Fig. 1) of the indicated groups. ○, Outlying values. There was no statistically significant difference in all multiple comparison analyses.

**Figure S4. Quantification of eDNA in the isolated ECM.** eDNA in the ECM of the MRSA and MSSA strains were quantified using Qubit dsDNA BR Kit. The strains were categorized into three groups: low, medium and high biofilm producers. The line in each box plot represents the median eDNA level of the indicated groups. ○, Outlying values. \*,  $P < 0.05$ . NS, not significant.

**Figure S5. Identification of PIA in the isolated ECM.** ECM isolated from the indicated strains with high biofilm-forming capacity were separated by SDS-PAGE and transferred to a membrane. The membrane was probed with HRP-WGA to detect PIA staked on the top of the gel. MR10 wild-type and its isogenic  $\Delta icaA$  strains grown in BHI, BHIG, or BHIN were used as a positive and a negative control, respectively. Sensitivities of the biofilms to the ECM-degrading enzymes are also indicated. Upper cases indicate the culture media used, and otherwise, the strains were grown in BHIG medium. S, sensitive.

**Figure S6. Effects of glucose and NaCl on profiles of proteins in the ECM.** The indicated strains of MRSA (a) and MSSA (b) were cultured in BHI, BHIG and BHIN, and proteins in the ECM were analysed by SDS-PAGE with CBB staining.

## SUPPLEMENTARY REFERENCES

1. Bae, T. & Schneewind, O. Allelic replacement in *Staphylococcus aureus* with inducible counter-selection. *Plasmid* **55**, 58-63 (2006).
2. Chiba, A., Sugimoto, S., Sato, F., Hori, S. & Mizunoe, Y. A refined technique for extraction of extracellular matrices from bacterial biofilms and its applicability. *Microb. Biotechnol.* **8**, 392-403 (2015).
3. Ho, S.N., Hunt, H.D., Horton, R.M., Pullen, J.K. & Pease, L.R. Site-directed mutagenesis by overlap extension using the polymerase chain reaction. *Gene* **77**, 51-59 (1989).
4. Bibalan, M.H., Shakeri, F., Javid, N., Ghaemi, A. & Ghaemi, E.A. Accessory gene regulator types of *Staphylococcus aureus* isolated in Gorgan, North of Iran. *J. Clin. Diagn. Res.* **8**, DC07-9 (2014).
5. Enright, M.C., Day, N.P., Davies, C.E., Peacock, S.J. & Spratt, B.G. Multilocus sequence typing for characterization of methicillin-resistant and methicillin-susceptible clones of *Staphylococcus aureus*. *J. Clin. Microbiol.* **38**, 1008-1015 (2000).
6. Kreiswirth *et al.* The toxic shock syndrome exotoxin structural gene is not detectably transmitted by a prophage. *Nature* **305**, 709-712 (1983).
7. Sugimoto, S. *et al.* *Staphylococcus epidermidis* Esp degrades specific proteins associated with *Staphylococcus aureus* biofilm formation and host-pathogen interaction. *J. Bacteriol.* **195**, 1645-1655 (2013).
8. Sugimoto, S., Iwase, T., Sato, F., Tajima, A., Shinji, H. & Mizunoe, Y. Cloning, expression and purification of extracellular serine protease Esp, a biofilm-degrading enzyme, from *Staphylococcus epidermidis*. *J. Appl. Microbiol.* **111**, 1406-1415 (2011).

**Table S1. Bacterial strains used in this study**

| <i>S. aureus</i> strains      | Isolation sites and description            | References/sources |
|-------------------------------|--------------------------------------------|--------------------|
| Laboratory strain             |                                            |                    |
| RN4220                        | Restriction deficient derivative of 8325-4 | 6                  |
| RN4220 <i>icaA</i>            | $\Delta$ <i>icaA</i> strain                | This study         |
| Clinical strains <sup>a</sup> |                                            |                    |
| MRSA                          |                                            |                    |
| MR1                           | Wound                                      | This study         |
| MR2                           | Ear                                        | This study         |
| MR3                           | Wound                                      | This study         |
| MR4                           | Nasal cavity                               | This study         |
| MR5                           | Sputum                                     | This study         |
| MR6                           | Throat                                     | This study         |
| MR7                           | Throat                                     | This study         |
| MR8                           | Throat                                     | This study         |
| MR9                           | Sputum                                     | This study         |
| MR10                          | Urinary catheter                           | 2, 7               |
| MR11                          | Skin                                       | This study         |
| MR12                          | Sputum                                     | This study         |
| MR13                          | Throat                                     | This study         |
| MR14                          | Pus                                        | This study         |
| MR15                          | Throat                                     | This study         |
| MR16                          | Sputum                                     | This study         |
| MR17                          | Wound                                      | This study         |
| MR18                          | Sputum                                     | This study         |
| MR19                          | Sputum                                     | This study         |
| MR20                          | Sputum                                     | This study         |
| MR22                          | Urine                                      | This study         |
| MR23                          | Pus                                        | 2, 7, 8            |
| MR24                          | Urine                                      | This study         |
| MR10 $\Delta$ <i>icaA</i>     | $\Delta$ <i>icaA</i> strain                | This study         |
| MSSA                          |                                            |                    |
| MS1                           | Throat                                     | This study         |
| MS2                           | Wound                                      | This study         |
| MS3                           | Urinary catheter                           | This study         |
| MS4                           | Sputum                                     | 7                  |
| MS5                           | Throat                                     | This study         |
| MS6                           | Vagina                                     | This study         |
| MS7                           | Ear                                        | This study         |
| MS8                           | Vagina                                     | This study         |
| MS9                           | Urine                                      | This study         |
| MS10                          | Blood                                      | 2, 7               |
| MS11                          | Wound                                      | This study         |
| MS12                          | Urine                                      | This study         |
| MS13                          | Wound                                      | This study         |
| MS14                          | Ear                                        | This study         |
| MS15                          | Feces                                      | This study         |
| MS16                          | Blood                                      | This study         |
| MS17                          | Pus                                        | This study         |
| MS18                          | Pus                                        | This study         |
| MS19                          | Sputum                                     | This study         |
| MS20                          | Sputum                                     | This study         |
| MS21                          | Ear                                        | This study         |
| MS22                          | Sputum                                     | This study         |
| MS23                          | Pus                                        | This study         |
| MS24                          | Paranasal sinus                            | This study         |

<sup>a</sup>All strains were isolated from patients in The Jikei University Hospital.

**Table S2. Sequence types, hemolytic activities and biofilm phenotypes of *S. aureus* clinical strains used in this study**

| Bacterial strains | MLST types | <i>agr</i> types | hemolytic activity <sup>a</sup> | Biofilm-forming capacity with glucose <sup>b</sup> | Biofilm-forming capacity with NaCl <sup>b</sup> | Biofilm PIA-dependency <sup>c</sup> |
|-------------------|------------|------------------|---------------------------------|----------------------------------------------------|-------------------------------------------------|-------------------------------------|
| <b>MRSA</b>       |            |                  |                                 |                                                    |                                                 |                                     |
| MR1               | 764        | II               | +                               | M                                                  | L                                               | n.d.                                |
| MR2               | 89         | III              | ++                              | H                                                  | L                                               | –                                   |
| MR3               | 5          | II               | –                               | M                                                  | H                                               | +                                   |
| MR4               | 1          | III              | ++                              | H                                                  | L                                               | –                                   |
| MR5               | 5          | III              | –                               | M                                                  | M                                               | n.d.                                |
| MR6               | 5          | III              | –                               | M                                                  | M                                               | n.d.                                |
| MR7               | 5          | III              | –                               | H                                                  | L                                               | –                                   |
| MR8               | 5          | III              | –                               | H                                                  | L                                               | –                                   |
| MR9               | 5          | II               | ++                              | H                                                  | L                                               | –                                   |
| MR10              | 5          | II               | +                               | H                                                  | M                                               | +                                   |
| MR11              | 91         | III              | ++                              | H                                                  | L                                               | –                                   |
| MR12              | 5          | II               | –                               | L                                                  | L                                               | n.d.                                |
| MR13              | 5          | II               | –                               | H                                                  | L                                               | –                                   |
| MR14              | 149        | II               | ++                              | M                                                  | L                                               | n.d.                                |
| MR15              | 149        | II               | ++                              | M                                                  | L                                               | n.d.                                |
| MR16              | 764        | II               | +                               | L                                                  | L                                               | n.n.                                |
| MR17              | 64         | III              | +                               | L                                                  | L                                               | n.d.                                |
| MR18              | 5          | III              | –                               | M                                                  | L                                               | n.d.                                |
| MR19              | 764        | II               | +                               | L                                                  | L                                               | n.d.                                |
| MR20              | 2613       | II               | –                               | M                                                  | L                                               | n.d.                                |
| MR22              | 64         | II               | +                               | L                                                  | L                                               | n.d.                                |
| MR23              | 380        | I                | ++                              | H                                                  | L                                               | –                                   |
| MR24              | 5          | II               | +                               | L                                                  | L                                               | n.d.                                |
| <b>MSSA</b>       |            |                  |                                 |                                                    |                                                 |                                     |
| MS1               | 25         | I                | –                               | M                                                  | L                                               | n.d.                                |
| MS2               | 432        | I                | +                               | L                                                  | L                                               | n.d.                                |
| MS3               | 20         | I                | –                               | H                                                  | L                                               | +                                   |
| MS4               | 8          | I                | –                               | M                                                  | L                                               | n.d.                                |
| MS5               | 6          | I                | –                               | H                                                  | L                                               | +                                   |
| MS6               | 15         | II               | ++                              | M                                                  | L                                               | n.d.                                |
| MS7               | 5          | II               | ++                              | H                                                  | M                                               | +                                   |
| MS8               | 72         | I                | ++                              | L                                                  | M                                               | n.d.                                |
| MS9               | 5          | II               | +                               | M                                                  | H                                               | +                                   |
| MS10              | 30         | III              | –                               | M                                                  | L                                               | n.d.                                |
| MS11              | 630        | I                | +++                             | L                                                  | L                                               | n.d.                                |
| MS12              | 45         | I                | +                               | M                                                  | H                                               | +                                   |
| MS13              | 15         | II               | +++                             | M                                                  | L                                               | n.d.                                |
| MS14              | 25         | I                | ++                              | L                                                  | L                                               | n.d.                                |
| MS15              | 45         | I                | –                               | M                                                  | L                                               | n.d.                                |
| MS16              | 12         | II               | –                               | M                                                  | L                                               | n.d.                                |
| MS17              | 623        | I                | –                               | M                                                  | L                                               | n.d.                                |
| MS18              | 188        | I                | ++                              | H                                                  | L                                               | –                                   |
| MS19              | 188        | I                | –                               | M                                                  | L                                               | n.d.                                |
| MS20              | 45         | I                | –                               | L                                                  | L                                               | n.d.                                |
| MS21              | 12         | II               | +                               | L                                                  | L                                               | n.d.                                |
| MS22              | 121        | IV               | +++                             | L                                                  | L                                               | n.d.                                |
| MS23              | 15         | II               | ++                              | M                                                  | L                                               | n.d.                                |
| MS24              | 30         | III              | –                               | H                                                  | L                                               | +                                   |

<sup>a</sup>+, unclear halo. ++, clear but small halo. +++, clear and large halo. –, no halo

<sup>b</sup>Determined in Fig. 1. H, high; M, medium; L, low.

<sup>c</sup>The Dispersin B-susceptible biofilm was considered to be a PIA-dependent biofilm as determined in Figs. 2 and 3. +, PIA-dependent biofilm. –, PIA-independent biofilm. n.d., not determined.

# Sugimoto *et al.* Figure S1

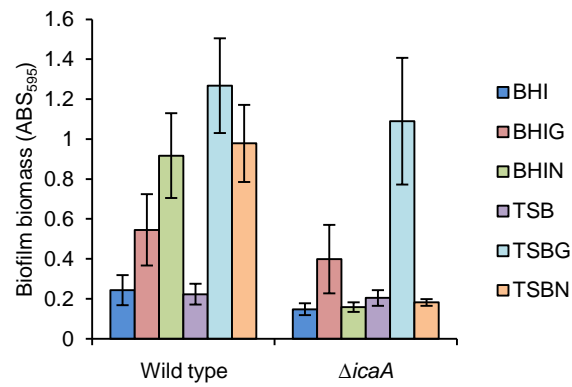

# Sugimoto *et al.* Figure S2

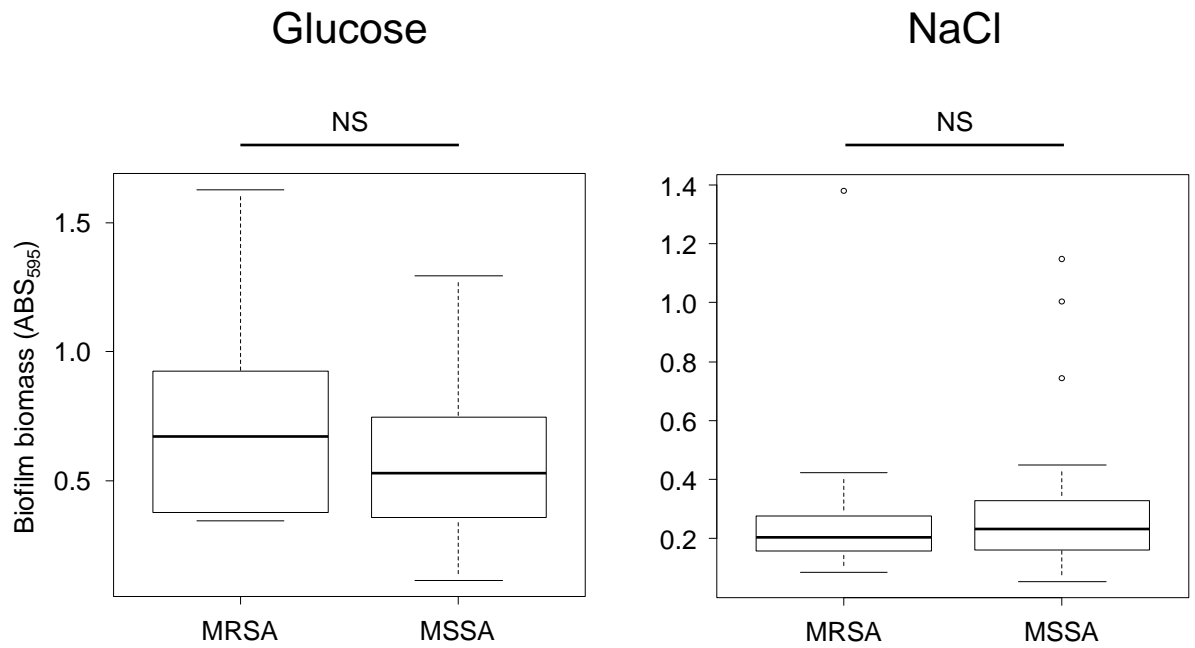

**Sugimoto *et al.* Figure S3**

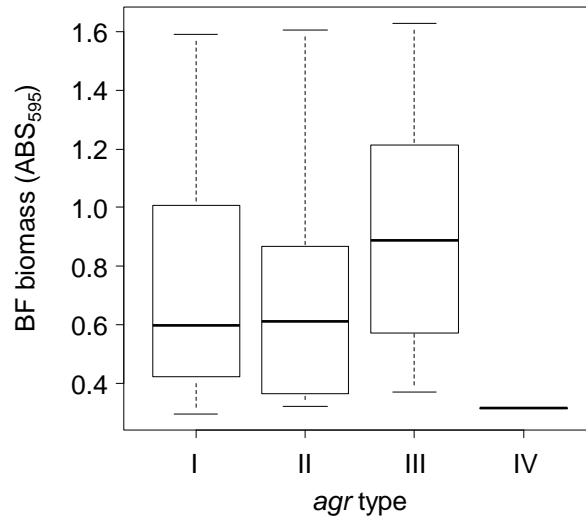

# Sugimoto *et al.* Figure S4

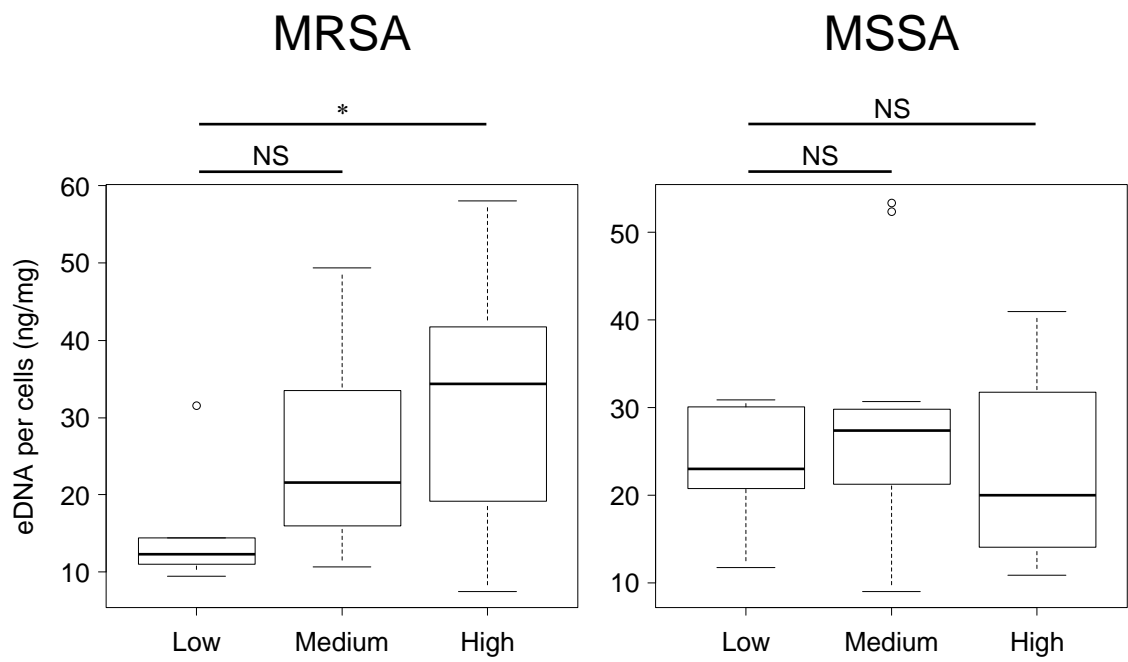

Sugimoto *et al.* Figure S5

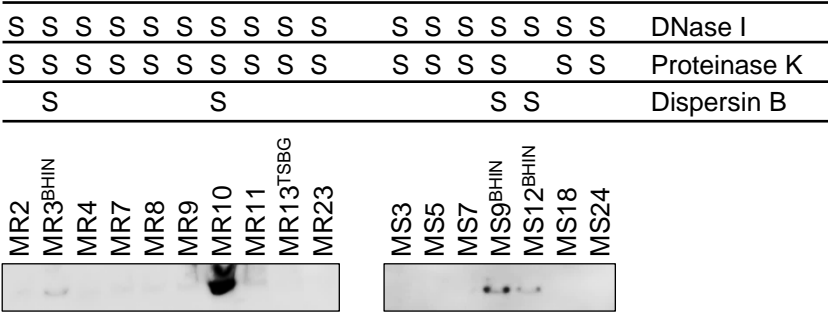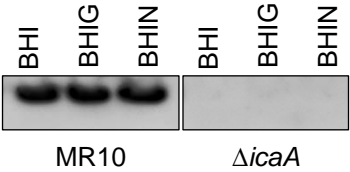

# Sugimoto *et al.* Figure S6

**a**

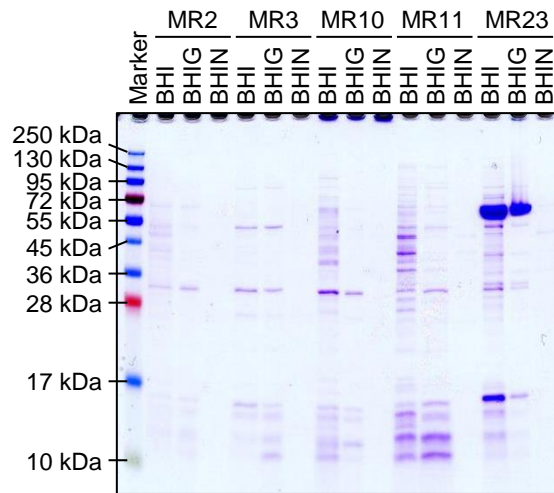

**b**

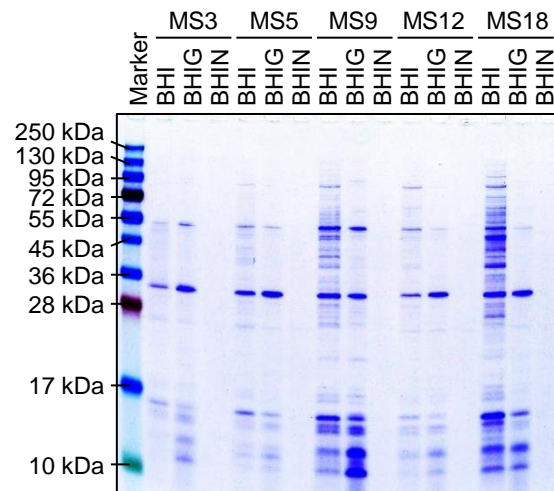

Supplement: Supplementary file 1 — Supplementary Information [file 41598_2018_20485_MOESM1_ESM.pdf]
